# Supplementary material
Source: publisher site journal article supplement (https://www.dovepress.com/article/375926)
Supplement: Supplementary file 1 [file get_supplementary_file.php]

Supplementary

Supplementary Table 1 Subjects characteristics and measurements

|  | 30-45 yo  (n=113) | | 46-59 yo  (n=94) | | 60-80 yo  (n=81) | | Normal range values |
| --- | --- | --- | --- | --- | --- | --- | --- |
| Age (years) | 36.37 ± 4.55 | | 51.81 ± 4.9 | | 69.77 ± 5.58 | |  |
| Weight (kg) | 63.17 ± 10.37 | 52.8 - 73.54 | 74.12 ± 12.32 | 61.8 - 86.44 | 68.72 ± 8.30 | 60.42 - 77.02 |  |
| BMI (kg/m2) | 23.71 ± 4.51 | 19.2 - 28.22 | 28.37 ± 4.78 | 23.59 - 33.15 | 27.80 ± 3.94 | 23.86 - 31.74 | < 29.9 |
| IgG (g/L) | 13.11 ± 3.74 | 9.37 - 16.85 | 12.54 ± 4.90 | 7.64 - 17.44 | 11.66 ± 3.31 | 8.35 - 14.97 | 6.58 - 18.37 |
| IgA (g/L) | 2.78 ± 1.22 | 1.56 - 4.00 | 2.97 ± 1.29 | 1.68 - 4.25 | 2.56 ± 1.19 | 1.37 - 3.75 | 0.71 - 3.6 |
| IgM (g/L) | 1.30 ± 0.64 | 0.67 - 1.94 | 1.18 ± 0.65 | 0.53 - 1.83 | 0.99 ± 0.46 | 0.53 - 1.45 | 0.4 - 2.63 |
| C3 (g/L) | 1.31 ± 0.43 | 0.89 - 1.74 | 1.19 ± 0.35 | 0.84 - 1.54 | 1.15 ± 0.28 | 0.87 - 1.42 | 0.89 - 1.87 |
| C4 (g/L) | 0.32 ± 0.13 | 0.20 - 0.45 | 0.34 ± 0.15 | 0.20 - 0.49 | 0.29 ± 0.09 | 0.21 - 0.38 | 0.165 - 0.38 |
| WBC (cellsx106/mL) | 7.17 ± 1.90 | 5.28 - 9.07 | 6.84 ± 2.30 | 4.54 - 9.14 | 6.38 ± 1.63 | 4.74 - 8.01 | 4.6 - 7.1 |
| Ly (%) | 25.48 ± 6.75 | 18.74 - 32.23 | 25.19 ± 5.99 | 19.20 - 31.18 | 26.19 ± 6.54 | 19.65 - 32.73 | 28 - 39 |
| Ly abs (cellsx106/mL) | 1.72 ± 0.50 | 1.21 - 2.22 | 1.61 ± 0.44 | 1.17 - 2.04 | 1.58 ± 0.46 | 1.12 - 2.04 | 1.6 - 2.4 |
| T-CD3+ (%) | 75 ± 6 | 69 - 81 | 72 ± 9 | 63 - 81 | 71 ± 8 | 63 - 79 | 67 - 76 |
| T-CD3+ abs (cellsx103/mL) | 1326 ± 410 | 916 - 1736 | 1280 ± 333 | 947 - 1613 | 1201 ± 366 | 835 - 1567 | 1100 - 1700 |
| T-CD4+ (%) | 46 ± 5 | 41 - 51 | 49 ± 8 | 41 - 57 | 50 ± 9 | 41 - 59 | 38 - 46 |
| T-CD4+ abs (cellsx103/mL) | 814 ± 255 | 559 - 1069 | 798 ± 222 | 576 - 1020 | 810 ± 269 | 541 - 1079 | 700 - 1100 |
| T-CD8+ (%) | 30 ± 6 | 24 - 36 | 24 ± 7 | 17 - 31 | 24 ± 9 | 15 - 33 | 31 - 40 |
| T-CD8+ abs (cellsx103/mL) | 529 ± 207 | 322 - 736 | 402 ± 172 | 230 - 574 | 399 ± 208 | 191 - 607 | 500 - 900 |
| T-CD4+/ T-CD8+ ratio | 1.6 ± 0.4 | 1.2 - 2.0 | 2.3 ± 0.9 | 1.4 - 3.2 | 2.5 ± 1.3 | 1.2 - 3.8 | 1 - 1.5 |
| B cells (%) | 15 ± 5 | 10 - 20 | 18 ± 8 | 10 - 26 | 18 ± 7 | 11 - 25 | 11 - 16 |
| B cells abs (cellsx103/mL) | 269 ± 124 | 145 - 393 | 304 ± 184 | 120 - 488 | 289 ± 127 | 162 - 416 | 200 - 400 |
| NK cells (%) | 10 ± 5 | 5 - 15 | 9 ± 6 | 3 - 15 | 7 ± 5 | 2 - 12 | 10 - 19 |
| NK cells abs (cellsx103/mL) | 166 ± 109 | 57 - 275 | 143 ± 116 | 27 - 259 | 119 ± 105 | 14 - 224 | 200 - 400 |
| Granulocytes (%) | 64 ± 8 | 56 - 72 | 65 ± 8 | 57 - 73 | 65 ± 7 | 58 - 72 | 43 - 76 |
| Granulocytes abs (cellsx103/mL) | 4662 ± 1515 | 3147 - 6177 | 4652 ± 1979 | 2673 - 6631 | 4269 ± 1315 | 2954 - 5584 | 1200 - 6800 |

Abbreviations: yo, years old; BMI, body mass index; Ig, immunoglobulin; C, complement; WBC, white blood cells; Ly, lymphocytes; abs, absolute count; T, T lymphocytes; CD, cluster of differentiation.

Supplementary Table 2 Adjusted P- values (Tukey’s multiple comparisons test) between groups obtained for BMI and humoral parameters

|  | BMI | IgG | IgA | IgM | C3 | C4 |
| --- | --- | --- | --- | --- | --- | --- |
| 30-45 yo vs 46-59 yo | 0.0093 (**) | NS | NS | NS | NS | NS |
| 30-45 yo vs 60-80 yo | 0.0201 (*) | 0.0263 (*) | NS | 0.0008 (***) | 0.0048 (**) | NS |
| 46-59 yo vs 60-80 yo | NS | NS | NS | NS | NS | NS |

* P≤0.05, ** P≤0.01, *** P≤0.001, NS P>0.05

Supplementary Table 3 Adjusted P- values (Tukey’s multiple comparisons test) between groups obtained for complete blood count (CBC) parameters

|  | WBC (cellsx106/mL) | Ly (%) | Ly abs (cellsx106/mL) | Granulocytes (%) | Granulocytes abs (cellsx103/mL) |
| --- | --- | --- | --- | --- | --- |
| 30-45 yo vs 46-59 yo | NS | NS | NS | NS | NS |
| 30-45 yo vs 60-80 yo | 0.0104 (*) | NS | NS | NS | NS |
| 46-59 yo vs 60-80 yo | NS | NS | NS | NS | NS |

* P≤0.05, NS P>0.05

Supplementary Table 4 Adjusted P- values (Tukey’s multiple comparisons test) between groups obtained for T-lymphocytes

|  | T-CD3+ (%) | T-CD3+ abs | T-CD4+ (%) | T-CD4+ abs | T-CD8+ (%) | T-CD8+ abs |
| --- | --- | --- | --- | --- | --- | --- |
| 30-45 yo vs 46-59 yo | NS | NS | 0.0202 (*) | NS | <0.0001 (****) | 0.0005 (***) |
| 30-45 yo vs 60-80 yo | 0.0022 (**) | 0.0418 | 0.0007 (***) | NS | <0.0001 (****) | <0.0001 (****) |
| 46-59 yo vs 60-80 yo | NS | NS | NS | NS | NS | NS |

* P≤0.05, ** P≤0.01, *** P≤0.001, **** P≤0.0001, NS P>0.05

Supplementary Table 5 Adjusted P- values (Tukey’s multiple comparisons test) between groups obtained for T-CD4+/ T-CD8+ ratio, B and NK cells

|  | T-CD4+/ T-CD8+ ratio | B cells (%) | B cells abs (cellsx103/mL) | NK cells (%) | NK cells abs (cellsx103/mL) |
| --- | --- | --- | --- | --- | --- |
| 30-45 yo vs 46-59 yo | 0.0002 (***) | 0.0181 (*) | NS | NS | NS |
| 30-45 yo vs 60-80 yo | <0.0001 (****) | 0.0092 (**) | NS | 0.0054 (**) | 0.0040 (**) |
| 46-59 yo vs 60-80 yo | NS | NS | NS | NS | NS |

* P≤0.05, ** P≤0.01, *** P≤0.001, **** P≤0.0001, NS P>0.05

Supplementary Table 6 *r* - values for cellular parameters

|  | *r* - 30-45 yo | *r* - 46-59 yo | *r* - 60-80 yo |
| --- | --- | --- | --- |
| Ly - T-CD3+ | 0.96 | 0.80 | 0.93 |
| Ly – B cells | 0.54 | 0.58 | 0.53 |
| Ly – NK cells | 0.29 | 0.48 | 0.44 |
| T-CD3+ - T-CD4+ | 0.26 | 0.62 | 0.40 |
| T-CD3+ - T-CD8+ | 0.63 | 0.43 | 0.46 |
| T-CD4+ - T-CD8+ | -0.54 | -0.39 | -0.60 |
| T-CD4+ - T-CD4+/T-CD8+ | 0.78 | 0.67 | 0.74 |
| T-CD8+ - T-CD4+/T-CD8+ | -0.89 | -0.80 | -0.88 |

*r* - Pearson’ correlation coefficient; -1 < *r* <1
